# Supplementary material
Source: Research Square preprint supplement (doi:10.21203/rs.3.rs-8920900/v1)
Supplement: Supplementary file 1 [file 067eb0d2c9e60aa78ee9a5af.docx]

Appendix 1

**Table 1:** Year of the latest survey in each of the ten East African countries, Demographic and Health Survey (DHS) data available, which was included in the study.

| **Country** | **Years of latest survey** |
| --- | --- |
| Burundi | 2016/17 |
| Ethiopia | 2016 |
| Kenya | 2022 |
| Madagascar | 2021 |
| Malawi | 2015/16 |
| Mozambique | 2022/23 |
| Rwanda | 2019/20 |
| Tanzania | 2022 |
| Uganda | 2016 |
| Zambia | 2018 |

**Table 2:** List of thevariables from the Demographic and Health Survey (DHS) included in the study, divided into children’s (under two years old), mothers’, and household characteristics.

| **Category** | **Variable** | **Definition / Categories** |
| --- | --- | --- |
| **Child’s**  **characteristics** | Age | 0-11 months  12-23 months |
| Sex | Male  Female |
| Weight at birth | **Underweight**  **Norma**l |
| Perceived size at birth | Small  Average  Large |
| Birth order for mother | 1  2–4  ≥5 |
| **Mother’s characteristics** | Education level | No education  Primary  Secondary  Higher |
| Work status | Yes  No |
| Age at first birth | 11–19 years  20–49 years |
| Marital status | Never married  Widowed  Separated  Married and living with partner |
| Antenatal visits | Yes  No |
| Postnatal visits | Yes  No |
| Place of delivery | Home  Health facility |
| Smoking habits | Yes  No |
| Frequency of smoking | Doesn’t smoke  Every day  Some days |
| **Household characteristics** | Age of household head | <35 years  35–55 years  >55 years |
| Sex of household head | Male  Female |
| Household wealth status | Poor  Middle  Rich |
| Toilet facility | Improved (good hygienic facility)  Unimproved (poor hygienic facility) |
| Drinking water source | Improved (good quality)  Unimproved (poor quality) |
| Electricity | Present in the household  Not present in the household |
