# Supplementary material
Source: Research Square preprint supplement (doi:10.21203/rs.3.rs-8920900/v1)
Supplement: Supplementary file 2 [file 34ba088fb63483c1dcd03d27.docx]

Supplementary Materials

**Supplementary Table 1:** Number (n) of missing responses *initially and **before and after recoding “don’t know,” “abroad,” and “not a de jure resident” as missing for each variable.

| **Variable** | **Missing* n** | **Missing** n** |
| --- | --- | --- |
| Cooking fuel | 70 | 98 |
| Residence area - Cooking Fuel | 98 | 98 |
| Cough | 994 | 1093 |
| Dyspnea | 994 | 1110 |
| Age of child | 994 | 994 |
| Sex of child | 0 | 0 |
| Weight at birth of infant | 0 | 0 |
| Size at birth | 0 | 1246 |
| Birth order | 0 | 0 |
| Education level of mother | 0 | 0 |
| Work status of mother | 0 | 0 |
| Age of mother at first birth | 2 | 2 |
| Marital status of mother | 0 | 0 |
| Antenatal visits | 213 | 454 |
| Postnatal visits | 294 | 396 |
| Place of child’s delivery | 429 | 1047 |
| Smoking status | 0 | 0 |
| Frequency of smoking | 0 | 0 |
| Age of household head | 0 | 0 |
| Sex of household head | 0 | 0 |
| Type of residence | 0 | 0 |
| Household weath status | 0 | 0 |
| Water source | 4595 | 4699 |
| Toilet facility | 1158 | 1208 |
| Electricity | 0 | 0 |
| Access to media | 0 | 0 |

**Supplementary Table 2**: Bivariate associations between independent variables and cough and dyspnea, among children under two years old across ten countries in East Africa, based on Demographic and Health Survey (DHS) 2015–2023.

| **Characteristics** | **Cough**  **p-value** | **Dyspnea**  **p-value** |
| --- | --- | --- |
| Cooking fuel type and type of residence (clean-urban vs clean-rural, unclean-urban, unclean-rural) | **0.0020** | **2.20E-16** |
| Age of child | **3.74E-09** | 0.2107 |
| Sex of child | 0.1652 | **0.0220** |
| Weight at birth | **0.0048** | **0.0445** |
| Perceived size at birth | **2.31E-16** | **2.20E-16** |
| Birth order of child | **0.0181** | **0.0005** |
| Mother's education level | **0.0001** | **1.35E-11** |
| Mother's employment | **2.20E-16** | **2.20E-16** |
| Mother’s age at first birth | 0.0928 | 0.2780 |
| Mother's marital status | 0.1824 | **0.0094** |
| Antenatal care visits | **7.80E-09** | 0.8698 |
| Postnatal care visit | **0.0283** | 0.7091 |
| Place of child’s delivery | **1.90E-08** | 0.2776 |
| Mother’s smoking | 0.3848 | 0.5387 |
| Mother’s frequency of smoking | 0.5968 | 0.8042 |
| Age of household head | **0.0046** | 0.1945 |
| Sex of household head | 0.1813 | 0.6122 |
| Household wealth status | 0.9202 | **0.0003** |
| Source of drinking water | **1.08E-09** | **0.0145** |
| Type of toilet facility | 0.6265 | **0.0002** |
| Household has electricity | **0.0002** | **2.20E-16** |
| Access to media | 0,6705 | **1.65E-07** |

**Note:** Variables (in bold) with a p-value less than 0.2 in the bivariate analysis were included in the multivariable model.

**Supplementary Table 3**: Main model, **multivariable logistic regression of factors associated with cough and dyspnea (separately), among children under two years old in ten East African countries, based on** Demographic and Health Survey (**DHS) 2015–2023.** Adjusted odds ratios (aORs) and 95% confidence intervals (CIs) are presented. For the cough, main model was adjusted for the child (age, weight at birth, perceived size at birth, birth order), maternal (education level, employment, antenatal care visit, postnatal care visit, place of delivery), and household (cooking fuel-residence, age of head in household, source of drinking water, electricity) characteristics and incorporates DHS survey weights. For the dyspnea, man model was adjusted for the child (sex, weight at birth, perceived size at birth, birth order), maternal (education level, employment, marital status), and household (cooking fuel-residence, wealth status, source of drinking water, type of toilet facility, access to media, electricity) characteristics and incorporates DHS survey weights.

| **Characteristics** | **Cough** | | **Dyspnea** | |
| --- | --- | --- | --- | --- |
| **aOR** | **95% CI** | **aOR** | **95% CI** |
| **Mother’s age at first birth** |  |  |  |  |
| 11–19 years | 1.00 |  | 1.00 |  |
| 20–49 years | 1.04 | 0.98 - 1.10 | 1.02 | 0.98 - 1.10 |
| **Sex of child** |  |  |  |  |
| Male | 1.00 |  |  |  |
| Female | 0.96 | 0.91 - 1.02 |  |  |
| **Age of child** |  |  | 1.00 |  |
| 0-11 months |  |  | 1.02 | 0.94 - 1.11 |
| 12-23 months |  |  |  |  |
| **Mother’s smoking** |  |  |  |  |
| No | 1.00 |  | 1.00 |  |
| Yes | 0.83 | 0.55 - 1.25 | 0.81 | 0.55 - 1.25 |
| **Mother’s frequency of smoking** |  |  |  |  |
| Doesn't smoke | 1.00 |  | 1.00 |  |
| Every day | 1.23 | 0.60 - 2.51 | 1.09 | 0.60 - 2.51 |
| **Mother's marital status** |  |  |  |  |
| Never married, widowed, separated | 1.00 |  | 1.00 |  |
| Married and living with partner | 0.96 | 0.88 - 1.06 | **1.17** | **1.02 – 1.33** |
| **Antenatal care visits** |  |  |  |  |
| Yes |  |  | 1.00 |  |
| No |  |  | **1.09** | **1.00 - 1.14** |
| **Postnatal care visit** |  |  |  |  |
| No |  |  | 1.00 |  |
| Yes |  |  | 1.09 | 0.99 - 1.19 |
| **Place of child’s delivery** |  |  |  |  |
| Home |  |  | 1.00 |  |
| Health Facility |  |  | 0.99 | 0.89 – 1.10 |
| **Household wealth status** |  |  |  |  |
| Poor | 1.00 |  |  |  |
| Middle | 1.01 | 0.93 - 1.09 |  |  |
| Rich | **1.11** | **1.01 - 1.22** |  |  |
| **Sex of household head** |  |  |  |  |
| Male | 1.00 |  | 1.00 |  |
| Female | 0.99 | 0.92 - 1.07 | 1.02 | 0.92 - 1.07 |
| **Age of household head** |  |  |  |  |
| <35 years |  |  | 1.00 |  |
| 35-55 years |  |  | **0.93** | **0.85 - 0.97** |
| > 55 years |  |  | 0.93 | 0.86 - 1.06 |
| **Type of toilet facility** |  |  |  |  |
| Improved | 1.00 |  |  |  |
| Unimproved | 1.06 | 0.99 - 1.13 |  |  |
| **Access to media** |  |  |  |  |
| Yes | 1.00 |  |  |  |
| No | 0.97 | 0.91 - 1.04 |  |  |

**Supplementary Table 4** : **Factors associated with cough among children under two years old in East Africa,** Demographic and Health Survey (**DHS) 2015–2023.** Crude and partially adjusted odds ratios (aORs) and 95% confidence intervals (CIs) are presented for two outcomes: cough. The model adjusts for child, maternal, or household characteristics and incorporates DHS survey weights.

| **Characteristic** | **MODEL 1** | | **MODEL 2** | | **MODEL 3** | | **MODEL 4** | |
| --- | --- | --- | --- | --- | --- | --- | --- | --- |
| **Crude** | | **Children's characteristics** | | **Mother's characteristics** | | **Household characteristics** | |
| **OR** | **95% CI** | **aOR** | **95% CI** | **aOR** | **95% CI** | **aOR** | **95% CI** |
| **Cooking fuel type and type of residence** |  |  |  |  |  |  |  |  |
| Clean-urban | 1.00 |  | 1.00 |  | 1.00 |  | 1.00 |  |
| Clean-rural | 0.91 | 0.60, 1.38 | 0.90 | 0.60, 1.37 | 0,90 | 0.59, 1.38 | 0,90 | 0.59, 1.37 |
| Unclean-urban | **1.34** | **1.05, 1.71** | **1,33** | **1.04, 1.69** | **1.42** | **1.10, 1.82** | **1,.31** | **1.03, 1.67** |
| Unclean-rural | **1.41** | **1.12, 1.77** | **1,40** | **1.11, 1.76** | **1,47** | **1.15, 1.87** | **1.42** | **1.11, 1.82** |
| **Age of child** |  |  |  |  |  |  |  |  |
| 0-11 months |  |  | 1.00 |  |  |  |  |  |
| 12-23 months |  |  | **1.18** | **1.12, 1.25** |  |  |  |  |
| **Sex of child** |  |  |  |  |  |  |  |  |
| Male |  |  | 1.00 |  |  |  |  |  |
| Female |  |  | 0,96 | 0.91, 1.01 |  |  |  |  |
| **Child’s weight at birth** |  |  |  |  |  |  |  |  |
| Underweight |  |  | 1.00 |  |  |  |  |  |
| Normal |  |  | 0.95 | 0.87, 1.04 |  |  |  |  |
| **Perceived size of child at birth** |  |  |  |  |  |  |  |  |
| Small |  |  | 1.00 |  |  |  |  |  |
| Average |  |  | **0.76** | **0.70, 0.82** |  |  |  |  |
| Large |  |  | 0.92 | 0.84, 1.00 |  |  |  |  |
| **Birth order of child** |  |  |  |  |  |  |  |  |
| 1 |  |  | 1.00 |  |  |  |  |  |
| 2 to 4 |  |  | **0.92** | **0.86, 0.99** |  |  |  |  |
| 5 and above |  |  | **0,.88** | **0.82, 0.96** |  |  |  |  |
| **Mother's education level** |  |  |  |  |  |  |  |  |
| No education |  |  |  |  | 100 |  |  |  |
| Primary |  |  |  |  | **1.09** | **1.01, 1.17** |  |  |
| Secondary |  |  |  |  | 1.02 | 0.93, 1.12 |  |  |
| Higher |  |  |  |  | 1.08 | 0.90, 1.30 |  |  |
| **Mother's employment status** |  |  |  |  |  |  |  |  |
| No |  |  |  |  | 1.00 |  |  |  |
| Yes |  |  |  |  | **1.55** | **1.45, 1.65** |  |  |
| **Mother’s age at first birth** |  |  |  |  |  |  |  |  |
| 11-19 years |  |  |  |  | 1.00 |  |  |  |
| 20-49 years |  |  |  |  | 1.03 | 0.97, 1.09 |  |  |
| **Mother's marital status** |  |  |  |  |  |  |  |  |
| Never married, widowed, separated |  |  |  |  | 1.00 |  |  |  |
| Married and living with partner |  |  |  |  | 0.95 | 0.88, 1.03 |  |  |
| **Antenatal care visits** |  |  |  |  |  |  |  |  |
| Yes |  |  |  |  | 1.00 |  |  |  |
| No |  |  |  |  | **0.82** | **0.70, 0.95** |  |  |
| **Postnatal care visit** |  |  |  |  |  |  |  |  |
| No |  |  |  |  | 1.00 |  |  |  |
| Yes |  |  |  |  | **1.07** | **1.00, 1.14** |  |  |
| **Place of child’s delivery** |  |  |  |  |  |  |  |  |
| Home |  |  |  |  | 1.00 |  |  |  |
| Health Facility |  |  |  |  | **1.17** | **1.08, 1.27** |  |  |
| **Smokes** |  |  |  |  |  |  |  |  |
| No |  |  |  |  | 1.00 |  |  |  |
| Yes |  |  |  |  | 0.84 | 0.56, 1.25 |  |  |
| **Frequency of smoking** |  |  |  |  |  |  |  |  |
| Doesn't smoke |  |  |  |  | 1.00 |  |  |  |
| Every day |  |  |  |  | 1.18 | 0.58, 2.43 |  |  |
| **Access to media** |  |  |  |  |  |  |  |  |
| Yes |  |  |  |  |  |  | 1.00 |  |
| No |  |  |  |  |  |  | 0.95 | 0.89, 1.02 |
| **Age of household head** |  |  |  |  |  |  |  |  |
| <35 years |  |  |  |  |  |  | 1.00 |  |
| 35-55 years |  |  |  |  |  |  | **0.90** | **0.85, 0.96** |
| > 55 years |  |  |  |  |  |  | 0,94 | 0.85, 1.04 |
| **Sex of household head** |  |  |  |  |  |  |  |  |
| Male |  |  |  |  |  |  | 1.00 |  |
| Female |  |  |  |  |  |  | 1.04 | 0.97, 1.11 |
| **Household wealth status** |  |  |  |  |  |  |  |  |
| Poor |  |  |  |  |  |  | 1.00 |  |
| Middle |  |  |  |  |  |  | 1.01 | 0.93, 1.09 |
| Rich |  |  |  |  |  |  | **1.10** | **1.00, 1.21** |
| **Main source of drinking water** |  |  |  |  |  |  |  |  |
| Improved |  |  |  |  |  |  | 1.00 |  |
| Unimproved |  |  |  |  |  |  | **0.76** | **0.70, 0.83** |
| **Type of toilet facility** |  |  |  |  |  |  |  |  |
| Improved |  |  |  |  |  |  | 1.00 |  |
| Unimproved |  |  |  |  |  |  | 1.00 | 0.93, 1.06 |
| **Household has electricity** |  |  |  |  |  |  |  |  |
| No |  |  |  |  |  |  | 1.00 |  |
| Yes |  |  |  |  |  |  | **0.83** | **0.75, 0.92** |

**Note**: The main model was adjusted for variables with p-values < 0.2 in the bivariate analysis (Supplementary table 3). For the cough, it was no adjusted (Model 1), adjusted for only child (age, weight at birth, perceived size at birth, birth order) – Model 2, only maternal (education level, employment, antenatal care visit, postnatal care visit, place of delivery) – Model 3, and household (cooking fuel-residence, age of head in household, source of drinking water, electricity) – Model 4- characteristics and incorporates DHS survey weights.

**Supplementary Table 5**: **Factors associated with dyspnea among children under two years old in East Africa,** Demographic and Health Survey (**DHS) 2015–20243.** Crude and partially adjusted odds ratios (aORs) and 95% confidence intervals (CIs) are presented for two outcomes: dyspnea. The model adjusts for child, maternal, or household characteristics and incorporates DHS survey weights.

| **Characteristic** | **MODEL 1** | | **MODEL 2** | | **MODEL 3** | | **MODEL 4** | |
| --- | --- | --- | --- | --- | --- | --- | --- | --- |
| **Crude** | | **Children's characteristics** | | **Mother's characteristics** | | **Household characteristics** | |
| **OR** | **95% CI** | **aOR** | **95% CI** | **aOR** | **95% CI** | **aOR** | **95% CI** |
| **Cooking fuel type and type of residence** |  |  |  |  |  |  |  |  |
| Clean-urban | 1.00 |  | 1.00 |  | 1.00 |  | 1.00 |  |
| Clean-rural | 1.83 | 0.91, 3.70 | 1.82 | 0.90, 3.66 | 1,75 | 0.87, 3.54 | 1,75 | 0.86, 3.53 |
| Unclean-urban | **2.6** | **1.77, 3.82** | **2.52** | **1.72, 3.69** | **2,45** | **1.66, 3.64** | **2,31** | **1.57, 3.39** |
| Unclean-rural | **4,.1** | **2.84, 5.93** | **3.9** | **2.70, 5.62** | **3,48** | **2.37, 5.10** | **3,48** | **2.37, 5.11** |
| **Age of child** |  |  |  |  |  |  |  |  |
| 0–11 months |  |  | 1.00 |  |  |  |  |  |
| 12–23 months |  |  | 1,05 | 0.97, 1.14 |  |  |  |  |
| **Sex of child** |  |  |  |  |  |  |  |  |
| Male |  |  | 1.00 |  |  |  |  |  |
| Female |  |  | **0,92** | **0.85, 0.99** |  |  |  |  |
| **Child’s weight at birth** |  |  |  |  |  |  |  |  |
| Underweight |  |  | 1.00 |  |  |  |  |  |
| Normal |  |  | 0,93 | 0.82, 1.05 |  |  |  |  |
| **Perceived size of child at birth** |  |  |  |  |  |  |  |  |
| Small |  |  | 1.00 |  |  |  |  |  |
| Average |  |  | **0,70** | **0.63, 0.78** |  |  |  |  |
| Large |  |  | **0,95** | **0.84, 1.06** |  |  |  |  |
| **Birth order of child** |  |  |  |  |  |  |  |  |
| 1 |  |  | 1.00 |  |  |  |  |  |
| 2 to 4 |  |  | 0,92 | 0.84, 1.02 |  |  |  |  |
| 5 and above |  |  | 1,03 | 0.92, 1.15 |  |  |  |  |
| **Mother's education level** |  |  |  |  |  |  |  |  |
| No education |  |  |  |  | 1.00 |  |  |  |
| Primary |  |  |  |  | 0,97 | 0.88, 1.07 |  |  |
| Secondary |  |  |  |  | **0,83** | **0.73, 0.95** |  |  |
| Higher |  |  |  |  | **0,70** | **0.52, 0.94** |  |  |
| **Mother's employment status** |  |  |  |  |  |  |  |  |
| No |  |  |  |  | 1.00 |  |  |  |
| Yes |  |  |  |  | **1,50** | **1.37, 1.64** |  |  |
| **Mother’s age at first birth** |  |  |  |  |  |  |  |  |
| 11-19 years |  |  |  |  | 1.00 |  |  |  |
| 20-49 years |  |  |  |  | 1,01 | 0.93, 1.10 |  |  |
| **Mother's marital tatus** |  |  |  |  |  |  |  |  |
| Never married, widowed, separated |  |  |  |  | 1.00 |  |  |  |
| Married and living with partner |  |  |  |  | **1,13** | **1.02, 1.27** |  |  |
| **Antenatal care visits** |  |  |  |  |  |  |  |  |
| Yes |  |  |  |  | 1.00 |  |  |  |
| No |  |  |  |  | 1,01 | 0.82, 1.24 |  |  |
| **Postnatal care visits** |  |  |  |  |  |  |  |  |
| No |  |  |  |  | 1.00 |  |  |  |
| Yes |  |  |  |  | 1,08 | 0.99, 1.19 |  |  |
| **Place of child’s delivery** |  |  |  |  |  |  |  |  |
| Home |  |  |  |  | 1.00 |  |  |  |
| Health facility |  |  |  |  | 1,03 | 0.93, 1.15 |  |  |
| **Smokes** |  |  |  |  |  |  |  |  |
| No |  |  |  |  | 1.00 |  |  |  |
| Yes |  |  |  |  | 0,82 | 0.48, 1.41 |  |  |
| **Frequency of smoking** |  |  |  |  |  |  |  |  |
| Doesn't smoke |  |  |  |  | 1.00 |  |  |  |
| Every day |  |  |  |  | 1,05 | 0.41, 2.72 |  |  |
| **Access to media** |  |  |  |  |  |  |  |  |
| Yes |  |  |  |  |  |  | 1.00 |  |
| No |  |  |  |  |  |  | **1,09** | **1.00, 1.19** |
| **Age of household head** |  |  |  |  |  |  |  |  |
| <35 years |  |  |  |  |  |  | 1.00 |  |
| 35-55 years |  |  |  |  |  |  | 0,94 | 0.86, 1.02 |
| > 55 years |  |  |  |  |  |  | 0,87 | 0.76, 1.00 |
| **Sex of household head** |  |  |  |  |  |  |  |  |
| Male |  |  |  |  |  |  | 1.00 |  |
| Female |  |  |  |  |  |  | 0,98 | 0.89, 1.07 |
| **Household wealth status** |  |  |  |  |  |  |  |  |
| Poor |  |  |  |  |  |  | 1.00 |  |
| Middle |  |  |  |  |  |  | 1.00 | 0.90, 1.12 |
| Rich |  |  |  |  |  |  | **1,27** | **1.13, 1.43** |
| **Main source of drinking water** |  |  |  |  |  |  |  |  |
| Improved |  |  |  |  |  |  | 1.00 |  |
| Unimproved |  |  |  |  |  |  | **0,77** | **0.69, 0.86** |
| **Type of toilet facility** |  |  |  |  |  |  |  |  |
| Improved |  |  |  |  |  |  | 1.00 |  |
| Unimproved |  |  |  |  |  |  | 1,08 | 0.98, 1.18 |
| **Household has electricity** |  |  |  |  |  |  |  |  |
| No |  |  |  |  |  |  | 1.00 |  |
| Yes |  |  |  |  |  |  | **0,69** | **0.60, 0.78** |

**Note:** The main model was adjusted for variables with p-values < 0.2 in the bivariate analysis (Supplementary table 3). For the dyspnea, it was not adjusted (Model 1), adjusted only for the child(sex, weight at birth, perceived size at birth, birth order) – Model 2, only maternal (education level, employment, marital status)- Model 3, and only household (cooking fuel-residence, wealth status, source of drinking water, type of toilet facility, access to media, electricity) – Model 4- characteristics and incorporates DHS survey weights.
